# Supplementary material for: A multicultural heritage corridor construction system: application of an improved push-pull framework to the Ningbo Section of the Grand Canal of China
Source: Research Square preprint supplement (doi:10.21203/rs.3.rs-6534522/v1), 2025-06-04
Supplement: Supplementary file 1 [file 1525543093b2ac8744e78ac3.pdf]

**Table S1 | Cultural heritage list of three cultures**

| <b>Culture type</b>      | <b>Cultural heritage</b>                                                                                                                                                                                                                                                                                                                                                                                                                                                                                                                                                                                 |
|--------------------------|----------------------------------------------------------------------------------------------------------------------------------------------------------------------------------------------------------------------------------------------------------------------------------------------------------------------------------------------------------------------------------------------------------------------------------------------------------------------------------------------------------------------------------------------------------------------------------------------------------|
| Agrarian culture         | Hemudu, Jingtoushan, Tashan, Tongjiaao, Mingshanhou, Shiao, Baziqiao, Dongjiatiao, Lujiqiao, Henggang, Sixia, Dongcheng, Aojiashan, Xiazhuang, Maohu, Wuxing, Cihu, Xiaodongmeng, Shaxi, Xiawangdu, Zishan, Fujiashan, Tianluoshan, Yushan • Wuguishan Sites.                                                                                                                                                                                                                                                                                                                                            |
| Maritime fishing culture | Dongmen Mazu Temple, Daxie Site, Xiepu Wenwu Temple, Sanshan Guild Hall, Jingtoushan Site, Yushan • Wuguishan Site, Qing'an Guild Hall, Qiliyu Lighthouse, Coastal Lighthouses of Eastern Zhejiang, Xiangshan Fishermen's Work Songs, Stone Pedestal Carving, Xiepu Boat Drum, Decorative Boats, Xianxiang Mid-Autumn Fishermen's and Cotton Festival, Xiangshan Fish Rubbing Art, Ship Model Art, Andong Salt Drying Techniques, Bone and Wood Inlay Art (Jiangbei), Shipu Fish Lanterns, Traditional Craft of Farming (Fishing) Boat Building, Decorative Boat Making Techniques, "Bingchanggen" Site. |
| Maritime trade culture   | Houqibu Shipwreck, Yuehu Mosque, Guotong'ao Kiln Site, Qita Chan Temple, Shangshui'ao Kiln Site, Lishe Wharf, Ashoka Temple, Tiantong Temple, Doumen Bridge, Jixiang Chan Temple of Liusan Village, Baiyun Temple, Zhaobao Mountain Shipyard, Wanhu Sacred Ship, Tianfeng Pagoda, Hangji Pavilion, Site of Goryeo Embassy, Silongkou Kiln Site, Kaidaoshan Kiln Site, Housi'ao Celadon Kiln Site of Shanglin Lake, Traditional Craftsmanship of Yue Kiln Celadon, Yongfeng Granary Site, Yanqing Temple, Qing'an Guild Hall, Anlan Guild Hall.                                                           |

**Table S2 | Resistance factors for three cultures and weights**

| <b>Culture type</b>      | <b>Resistance factor</b>                                                    | <b>Weight</b> |
|--------------------------|-----------------------------------------------------------------------------|---------------|
| Agrarian culture         | ①Elevation                                                                  | 0.042         |
|                          | ②Slope                                                                      | 0.139         |
|                          | ③Distance from the river                                                    | 0.34          |
|                          | ④Distance from the road                                                     | 0.34          |
|                          | ⑤Land use type                                                              | 0.139         |
| Maritime fishing culture | ①Elevation                                                                  | 0.113         |
|                          | ②Slope                                                                      | 0.051         |
|                          | ③Distance from the coastline                                                | 0.547         |
|                          | ④Distance from the river                                                    | 0.240         |
|                          | ⑤Distance from the road                                                     | 0.049         |
| Maritime trade culture   | ①Elevation                                                                  | 0.059         |
|                          | ②Slope                                                                      | 0.159         |
|                          | ③Distance from the road                                                     | 0.254         |
|                          | ④Distance from the coastline                                                | 0.104         |
|                          | ⑤Distance from the routes of the Ningbo Section of the Grand Canal of China | 0.424         |

**Table S3 | Resistance factors and resistance grading**

| Resistance factor                                                             | Resistance value |             |         |           |                   |
|-------------------------------------------------------------------------------|------------------|-------------|---------|-----------|-------------------|
|                                                                               | 1                | 2           | 3       | 4         | 5                 |
| Elevation/m                                                                   | 0-200            | 200-400     | 400-600 | 600-800   | >800              |
| Slope/°                                                                       | 0-5              | 5-10        | 10-15   | 15-20     | >20               |
| Land use type                                                                 | Cultivated land  | Forest land | Pasture | Bare land | Construction land |
| Distance from the river/km                                                    | 0-0.5            | 0.5-1       | 1-3     | 3-5       | >5                |
| Distance from the road/km                                                     | 0-0.5            | 0.5-1       | 1-3     | 3-5       | >5                |
| Distance from the coastline/km                                                | 0-5              | 5-10        | 10-20   | 20-40     | >40               |
| Distance from the routes of the Ningbo Section of the Grand Canal of China/km | 0-5              | 5-10        | 10-20   | 20-40     | >40               |

**Table S4 | Spatial characteristics of multicultural heritage corridors**

| Corridor | Cultural origin | Corridor centrality | CWD /LCP_length | Tourism theme                                     |
|----------|-----------------|---------------------|-----------------|---------------------------------------------------|
| 1        | 1,3             | First-level         | 1.38-1.77       | Agrarian- maritime trade-maritime fishing culture |
| 1        | 7,8             | First-level         | 1.38-1.77       | Agrarian- maritime trade-maritime fishing culture |
| 3        | 6,7             | First-level         | 1.38-1.77       | Maritime trade-agrarian culture                   |
| 4        | 5,8             | First-level         | 1.38-1.77       | Maritime trade-maritime fishing culture           |
| 5        | 2,4             | Second-level        | 1.38-1.77       | Agrarian culture                                  |
| 6        | 7,10            | Second-level        | 1.77-2.35       | Agrarian-maritime trade-maritime fishing culture  |
| 7        | 8,9             | Second-level        | 1.77-2.35       | Maritime fishing trade                            |
| 8        | 7,9             | Second-level        | 1.77-2.35       | Agrarian-maritime trade-maritime fishing culture  |
| 9        | 3,5             | Third-level         | 1.36-1.38       | Maritime fishing-maritime trade culture           |
| 10       | 4,7             | Third-level         | 1.38-1.77       | Agrarian-maritime trade culture                   |
| 11       | 6,8             | Third-level         | 1.77-2.35       | Maritime trade-maritime fishing culture           |
| 12       | 9,10            | Third-level         | 1.38-1.77       | Maritime fishing culture                          |

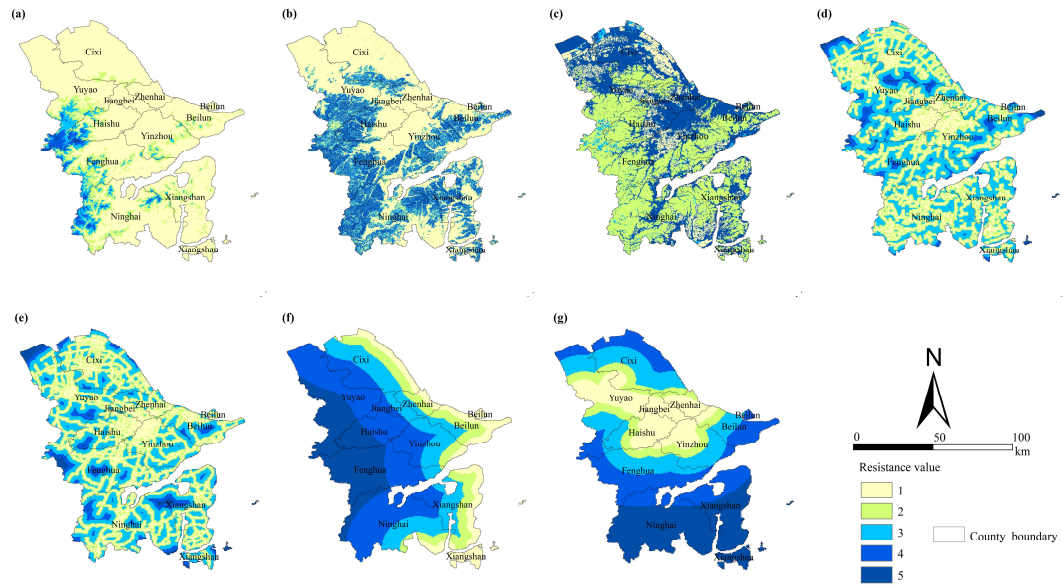

**Fig. S1 | Resistance factors and resistance grading.** **a** Elevation, **b** Solpe, **c** Land use type, **d** Distance from the river, **e** Distance from the road, **f** Distance from the coastline, **g** Distance from the routes of the Ningbo Section of the Grand Canal of China.
